# Supplementary material
Source: Springer Nature journal article supplement (https://www.springermedizin.de/resource/supplementary/12914_2013_299_MOESM3_ESM.pdf/9537252)

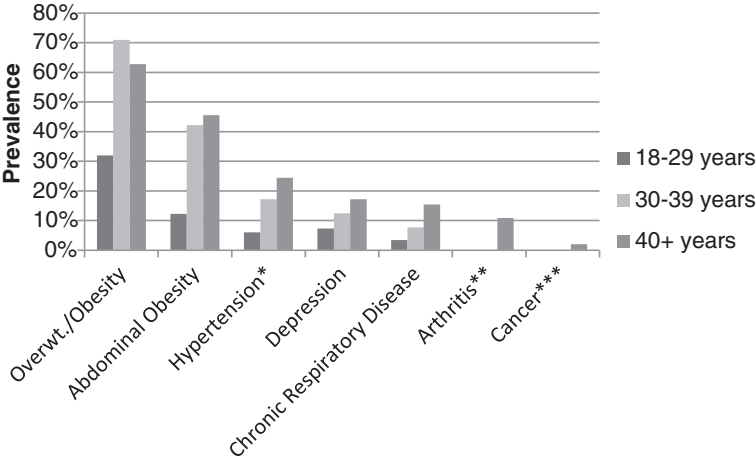

Supplement: MOESM3 [file 9537252]
